# Supplementary material for: Nature of proton dynamics in a polymer electrolyte membrane, nafion: a first-principles molecular dynamics study
Source: Royal Society of Chemistry journal article supplement (doi:10.1039/b819535h), 2009-01-01
Supplement: b819535h.pdf [file b819535h.pdf]

# Electronic Supplementary Information *for*

## Nature of Proton Conduction in a Polymer Electrolyte Membrane, Nafion

\*Yoong-Kee Choe<sup>1</sup>, Eiji Tsuchida<sup>1</sup>, Tamio Ikeshoji<sup>1</sup>, Shunsuke Yamakawa<sup>2</sup>, Shi-Aki Hyodo<sup>2</sup>

<sup>1</sup>*Research Institute for Computational Sciences (RICS), National Institute of Advanced Industrial Science and Technology (AIST), Central-2, Umezono 1-1-1, Tsukuba, Ibaraki 305-8578, Japan.*

<sup>2</sup>*Toyota Central R&D Labs., Inc., Nagakute, Aichi, 480-1192, Japan.*

\*Corresponding author : [yoongkee-choe@aist.go.jp](mailto:yoongkee-choe@aist.go.jp)

Fig. S1 shows mean square displacement (MSD) of proton (positive charge defect). It is seen that after 1 ps, MSD increases virtually linearly, which indicates that statistics are reasonably collected for the evaluation of diffusion coefficient.

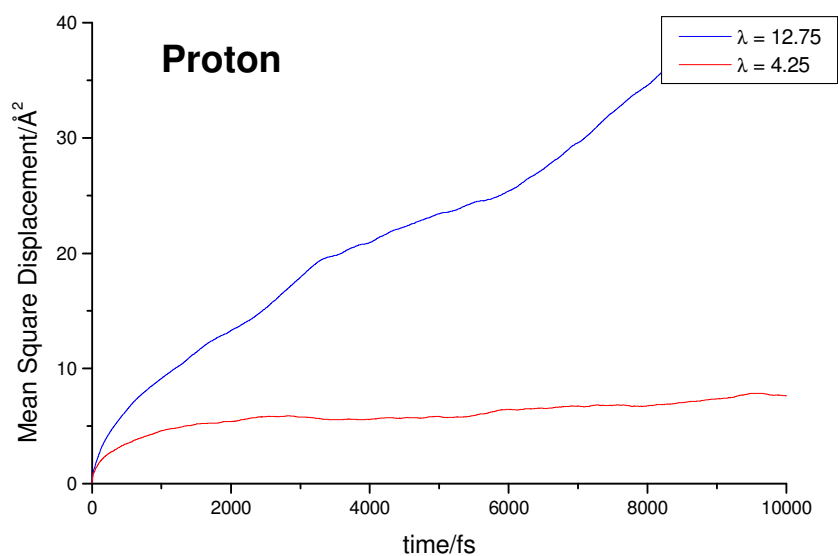

**Fig. S1. Mean square displacement vs. time for proton**
